# Supplementary material for: Surface Acoustic Waves (SAW)-Based Biosensing for Quantification of Cell Growth in 2D and 3D Cultures
Source: PubMed Central journal article supplement (PMC4721826; doi:10.3390/s151229909), 2015-12-19
Supplement: sensors-15-29909-s001.pdf [file sensors-15-29909-s001.pdf]

# Supplementary Materials: Surface Acoustic Waves (SAW)-Based Biosensing for Quantification of Cell Growth in 2D and 3D Cultures

Tao Wang <sup>1,2,†</sup>, Ryan Green <sup>1,3,†</sup>, Rajesh Ramakrishnan Nair <sup>1,4,5,†</sup>, Mark Howell <sup>1,3</sup>, Subhra Mohapatra <sup>1,3,\*</sup>, Rasim Guldiken <sup>1,2,\*</sup> and Shyam Sundar Mohapatra <sup>1,4,\*</sup>

Quantification of Cell Growth in 2D and 3D Cultures

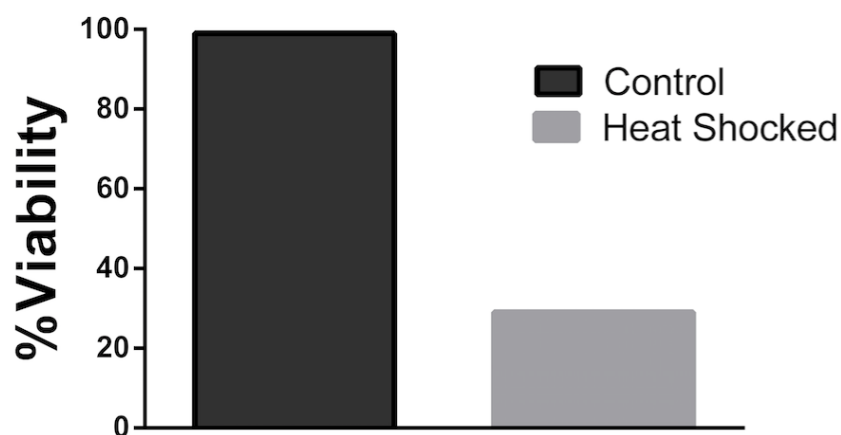

**Figure S1.** A549 cells were either left untreated (Control) or subjected to heat (Heat Shocked) at 56 °C for 15 min. At the end of the heat shock the cells were mixed with trypan blue solution and processed for cell counting using the T20™ automated cell counter according to the manufacturer's instructions (Bio-Rad). The data was plotted as % viability wherein the viability of the control cells was set at 100%.
